# Supplementary material for: Controlled synthesis of 3D flower-like MgWO4:Eu3+ hierarchical structures and fluorescence enhancement through introduction of carbon dots
Source: Royal Society of Chemistry journal article supplement (doi:10.1039/c7ce02048a), 2017-12-20
Supplement: c7ce02048a1.pdf [file c7ce02048a1.pdf]

## Supporting information

# Controlled synthesis of 3D flower-like MgWO<sub>4</sub>: Eu<sup>3+</sup> hierarchical structures and fluorescence enhancement through introducing carbon dots

Jingbin Huang,<sup>a,b</sup> Boshi Tian,<sup>a</sup> Jia Wang,<sup>a</sup> Yabo Wang,<sup>\*c</sup> Wei Lu,<sup>d</sup> Qingfeng Li,<sup>a</sup> Lin Jin,<sup>a</sup> Chunyang Li<sup>a</sup> and Zhenling Wang<sup>\*a</sup>

---

<sup>a</sup> The Henan Key Laboratory of Rare Earth Functional Materials; The Key Laboratory of Rare Earth Functional Materials and Applications, Zhoukou Normal University, Zhoukou 466001, P. R. China E-mail: zlwang2007@hotmail.com

<sup>b</sup> The College of Chemistry and Molecular Engineering, Zhengzhou University, Zhengzhou 450001, P. R. China

<sup>c</sup> College of Chemistry and Environmental Engineering, Pingdingshan University, Pingdingshan 467000, P. R. China

<sup>d</sup> University Research Facility in Materials Characterization and Device Fabrication, The Hong Kong Polytechnic University, Hong Kong, P. R. China

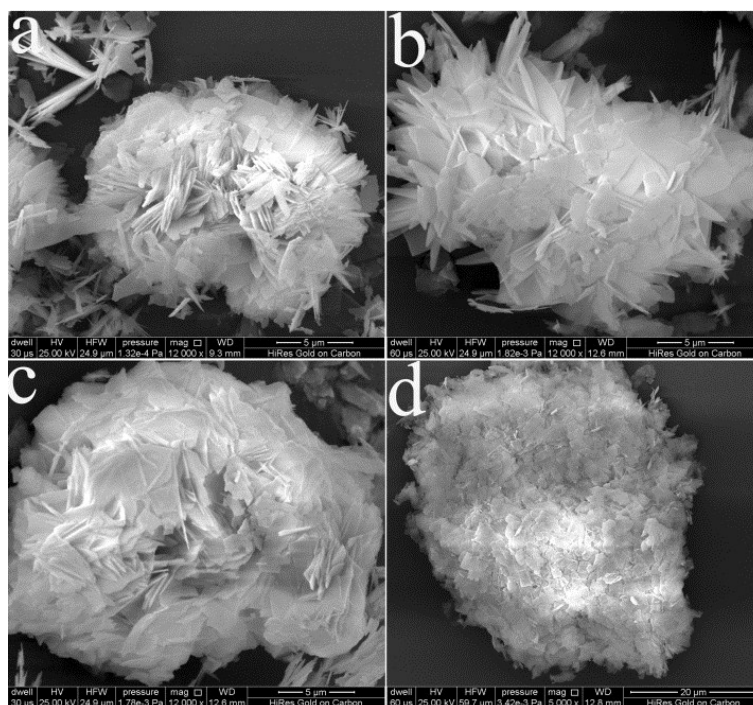

**Fig. S1** SEM images of  $\text{MgWO}_4: x\text{Eu}^{3+}$  samples with different doping concentrations:  $x =$  (a) 8%, (b) 10%, (c) 12% and (d) 16%.

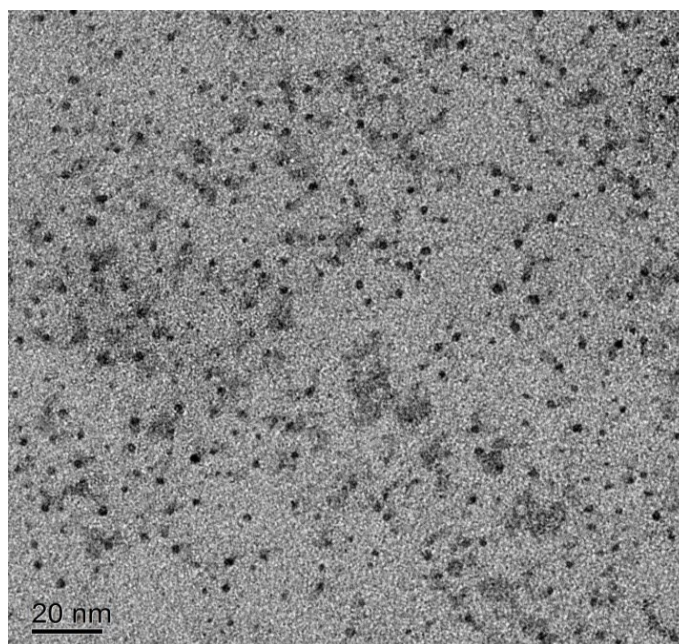

**Fig. S2** TEM image of CDs.

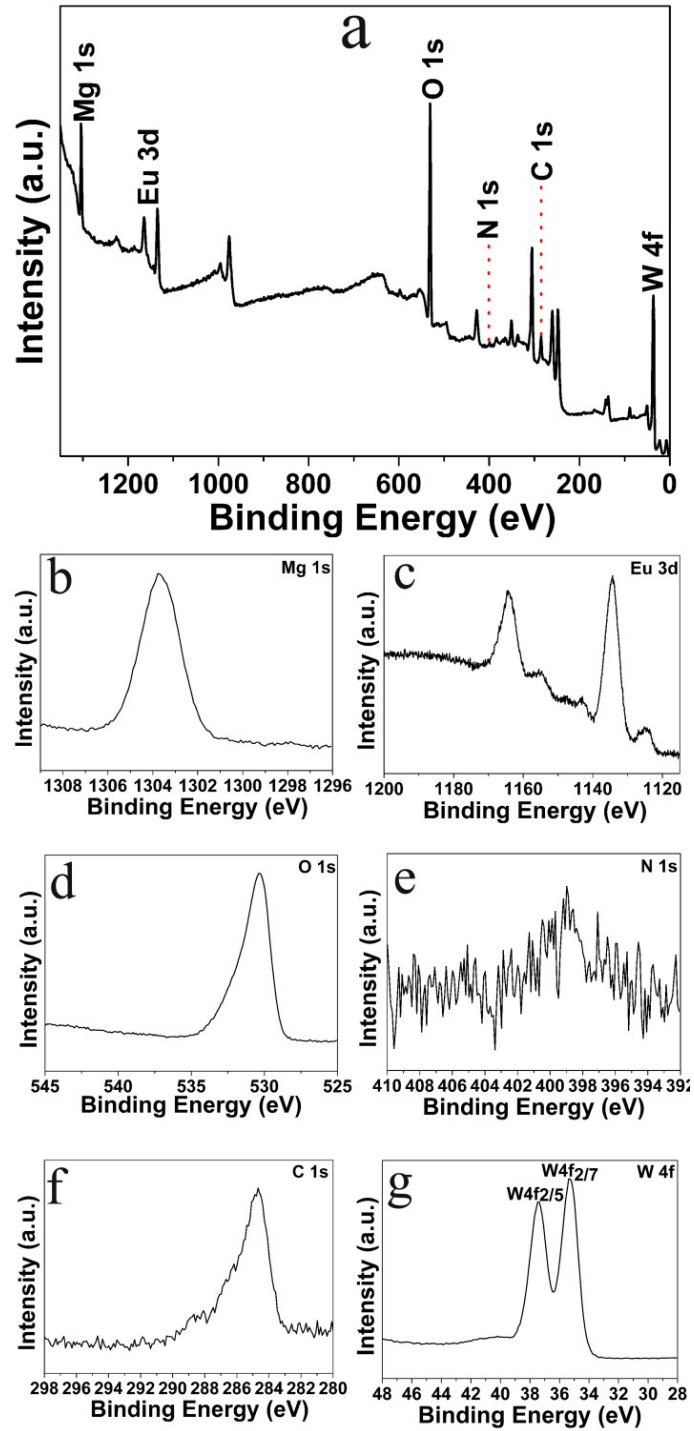

**Fig. S3** (a) XPS spectrum of 3D flower-like CDs/MgWO<sub>4</sub>: 5%Eu<sup>3+</sup> composites, and the corresponding high-resolution XPS spectra of (b) Mg 1s, (c) Eu 3d, (d) O 1s, (e) N 1s, (f) C 1s and (g) W 4f.

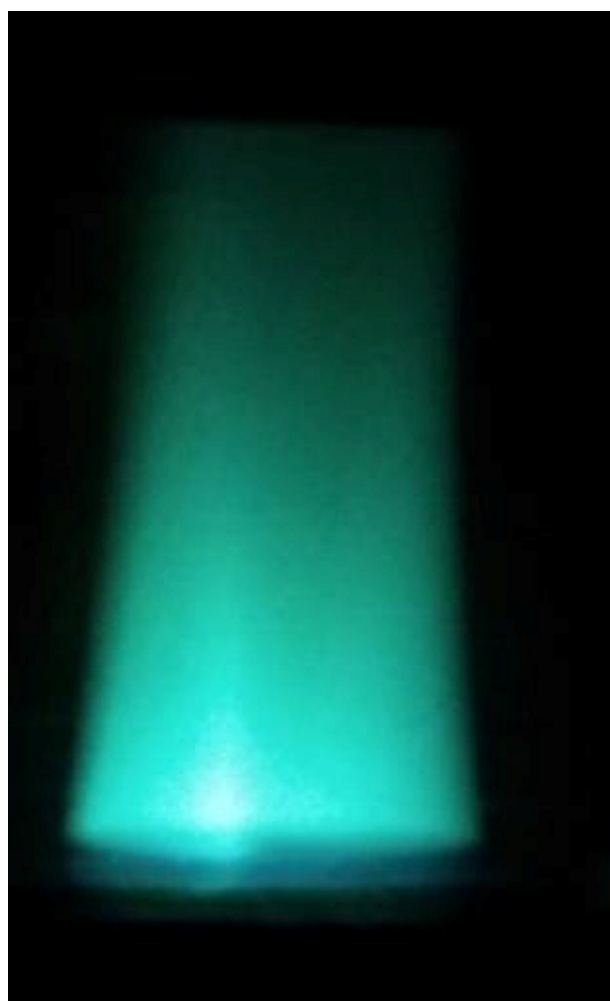

**Fig. S4** The luminescence photograph of CDs under the excitation of 440 nm.
